# Supplementary material for: Complete Chloroplast Genomes of Saccharum giganteum, Saccharum longisetosum, Cleistachne sorghoides, Sarga timorense, Narenga porphyrocoma and Tripsacum dactyloides. Comparisons with ITS phylogeny and Placement within Saccharum
Source: bioRxiv or medRxiv preprint supplement (doi:10.1101/2020.06.12.149476), 2020-06-14
Supplement: Supplementary file [file media-1.pdf]

## Supplementary Document 1

Chloroplast genomes assembled in this study from ONT MinION data

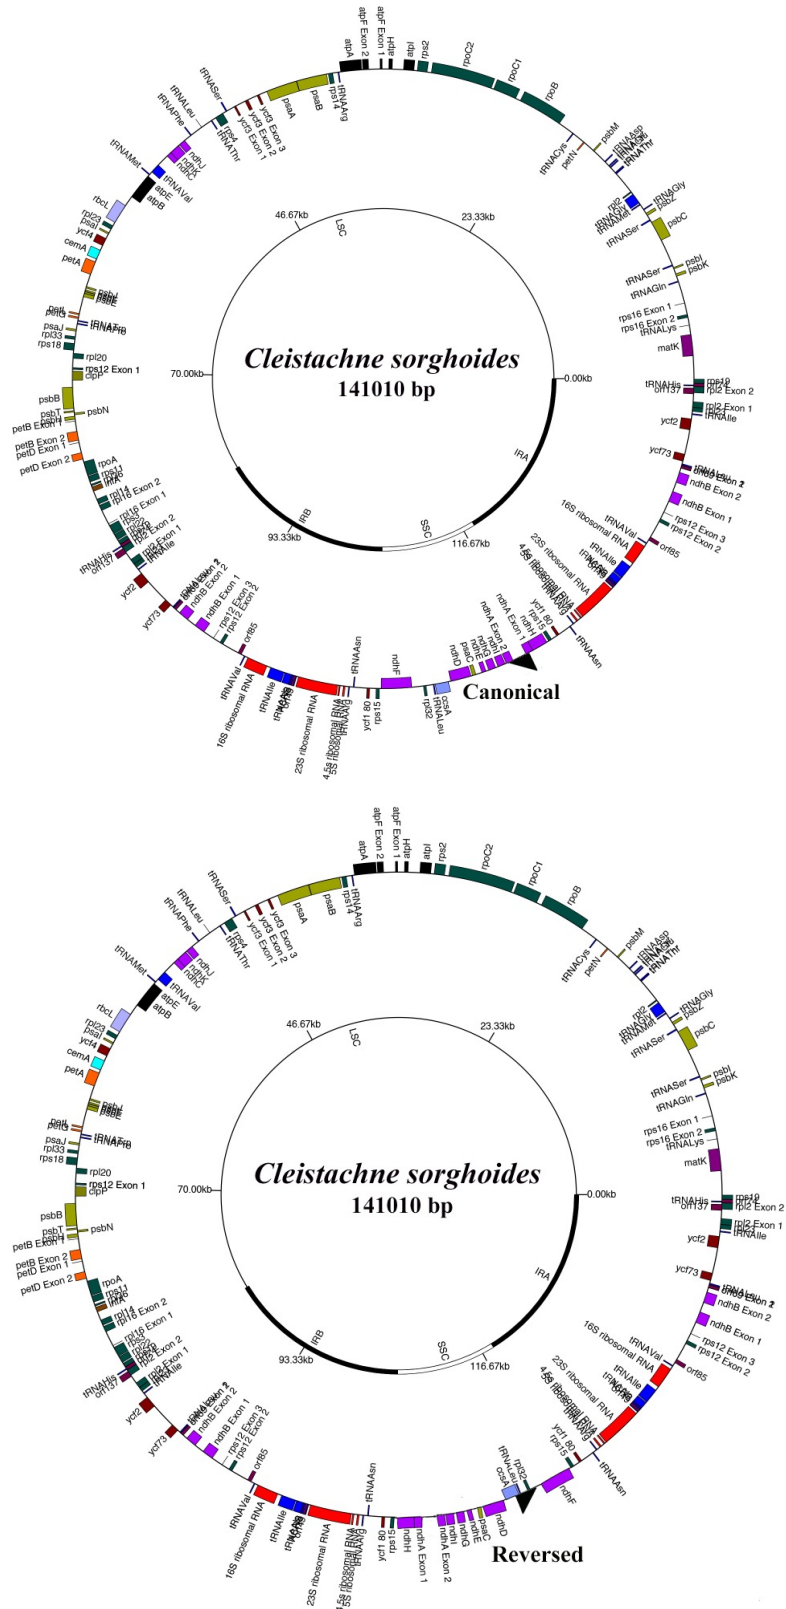

The two isoforms of the *Cleistachne sorghoides* chloroplast genome, with the canonical form (SSC in forward orientation) and reverse (SSC in reverse orientation) being present at a ratio of 51.4:48.6.



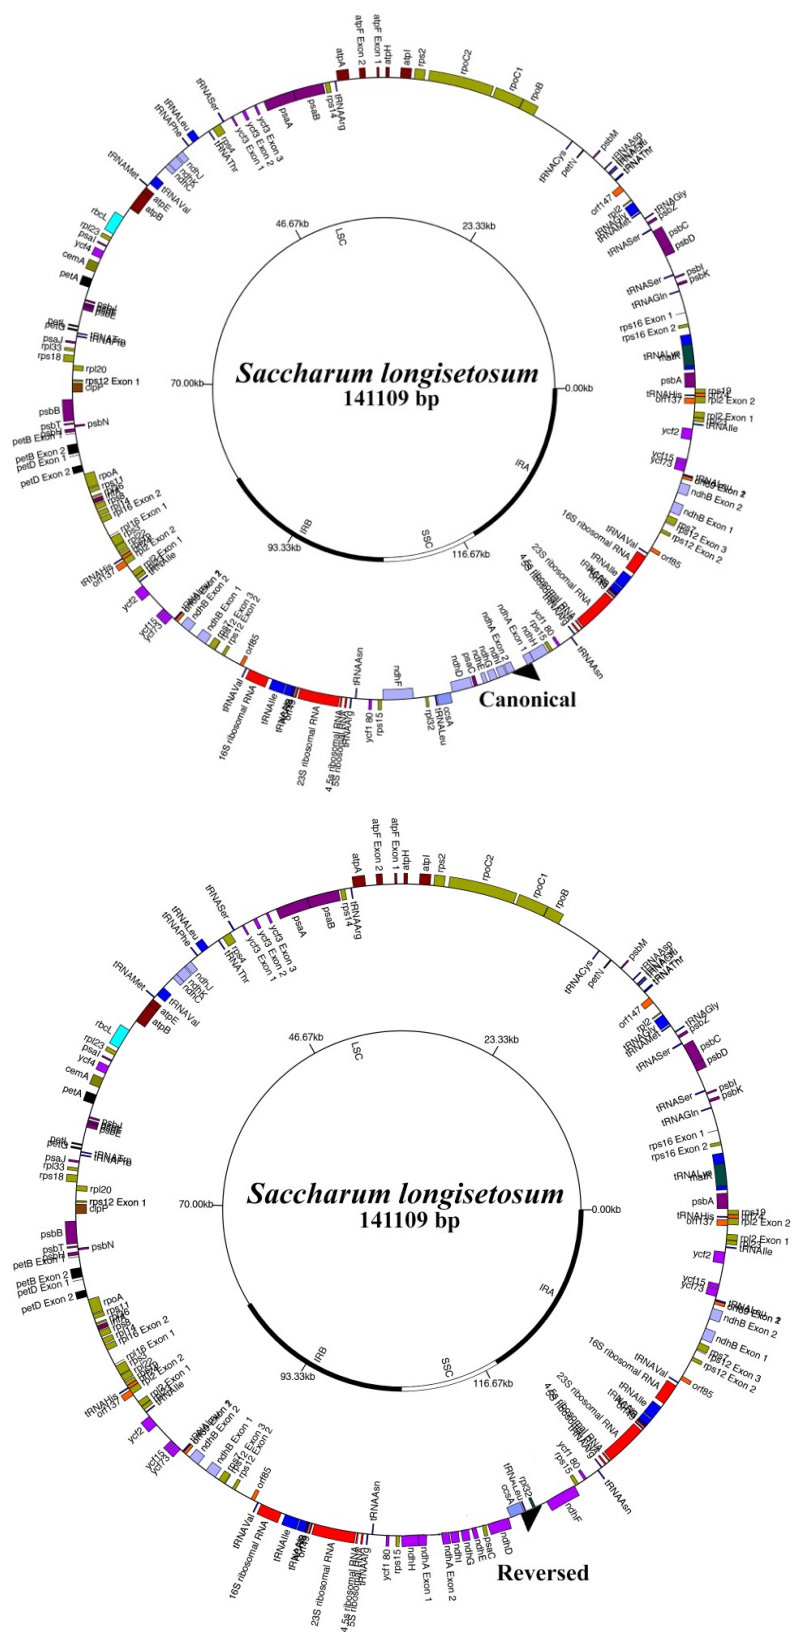

The two isoforms of the *Saccharum longisetosum* (*Erianthus rockii*) chloroplast genome, with the canonical form (SSC in forward orientation) and reverse (SSC in reverse orientation) being present at a ratio of 53.1:46.9.







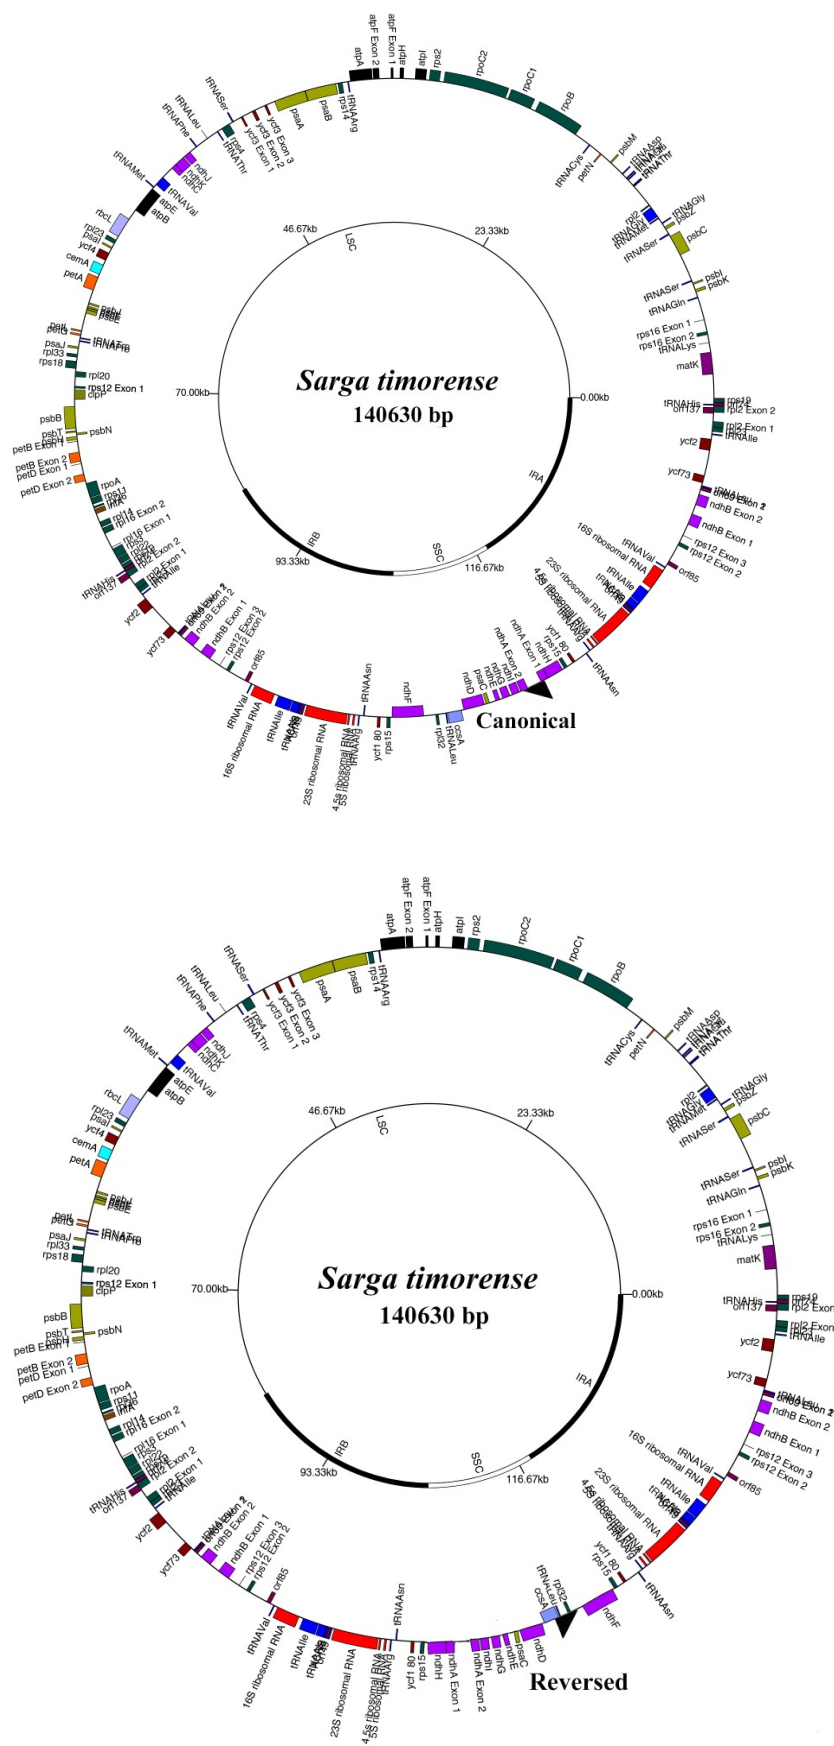

The two isoforms of the *Sarga timorensis* chloroplast genome, with the canonical form (SSC in forward orientation) and reverse (SSC in reverse orientation) being present at a ratio of 51.1:48.9.
